# Supplementary material for: The Utility of Acute‐Phase Proteins in the Assessment of Treatment Response in Dogs With Bacterial Pneumonia
Source: PubMed Central journal article supplement — J Vet Intern Med. 2016 Dec 29;31(1):124–33. doi: 10.1111/jvim.14631 (PMC5259651; doi:10.1111/jvim.14631), 2016-12-29

**Figure S1.** Serum C-reactive protein (CRP), serum amyloid A (SAA) and Haptoglobin (Hp) concentrations dogs with bacterial pneumonia (BP) (n=19) during the disease and follow up period. Each line shows results of a single dog. Figures A represent dogs with a less severe BP requiring < 2 days of hospitalization and figures B represent dogs with a more severe BP requiring >2 days of hospitalization.

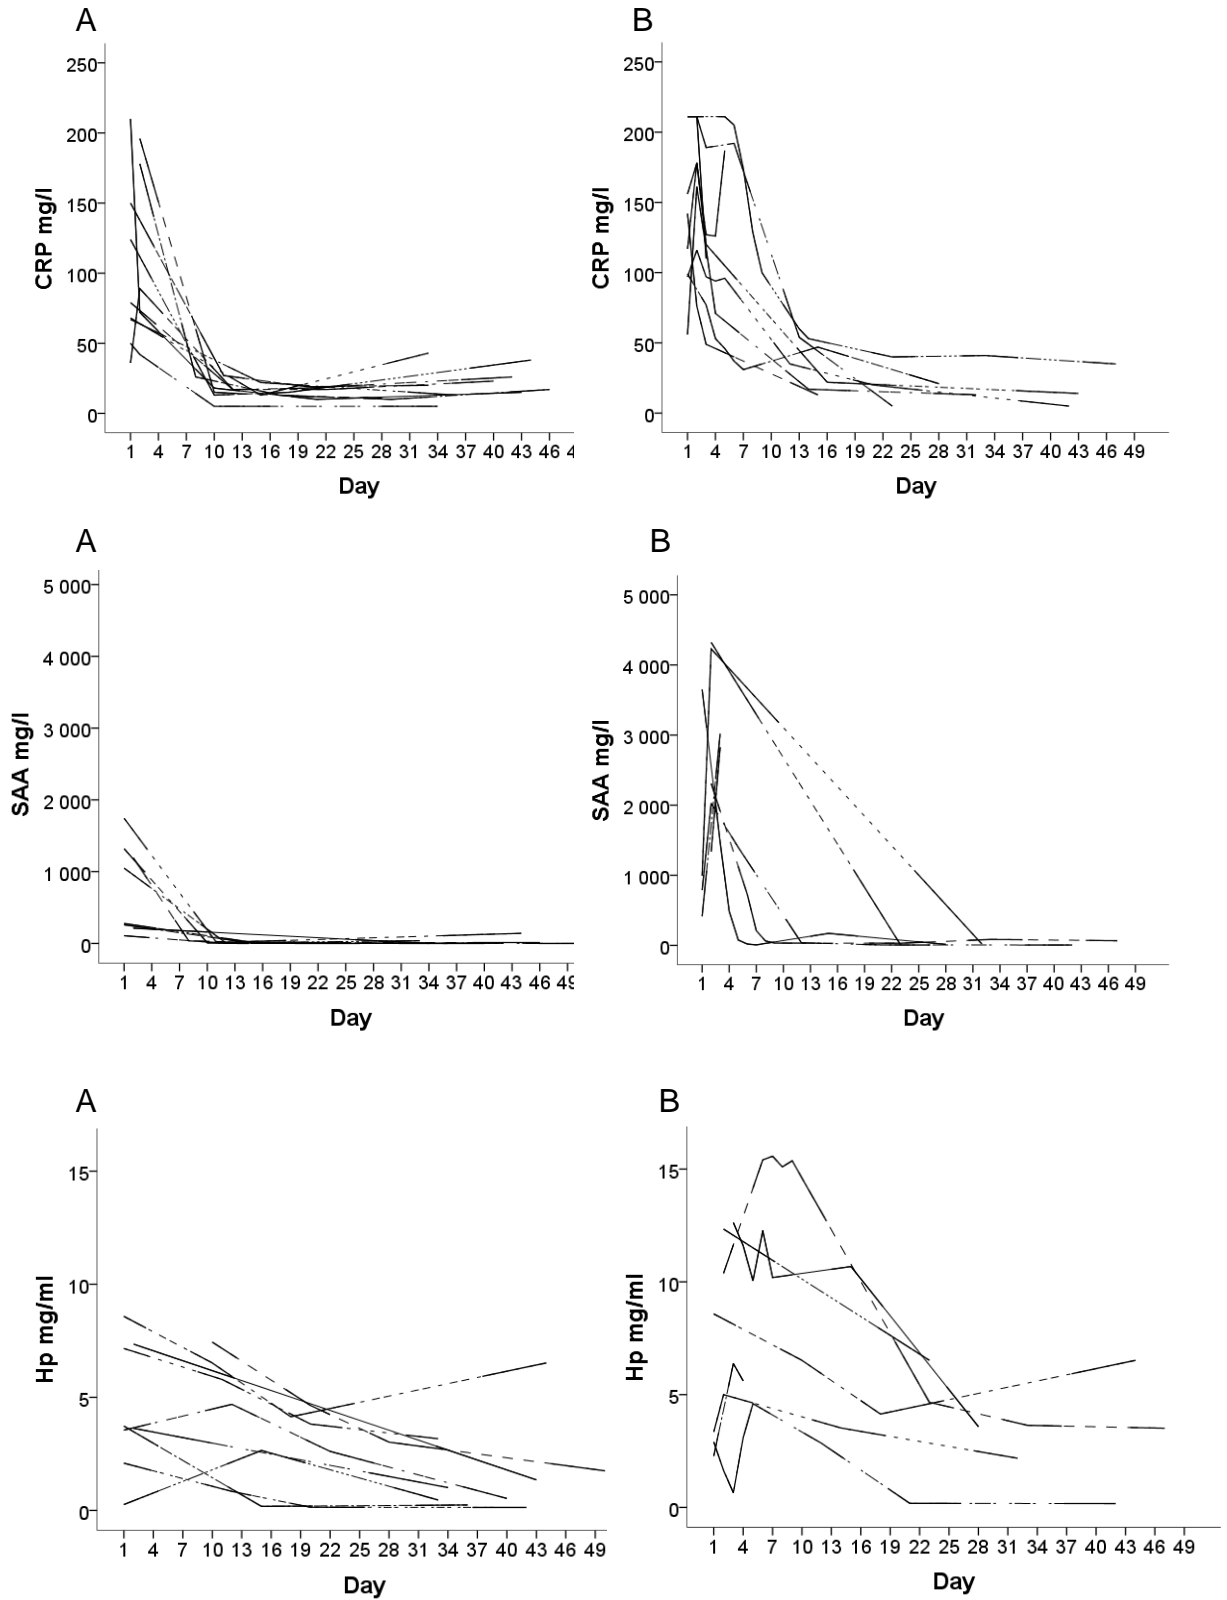

Supplement: JVIM-31-124-s001.pdf [file JVIM-31-124-s001.pdf]
