# Supplementary material for: The Utility of Acute‐Phase Proteins in the Assessment of Treatment Response in Dogs With Bacterial Pneumonia
Source: PubMed Central journal article supplement — J Vet Intern Med. 2016 Dec 29;31(1):124–33. doi: 10.1111/jvim.14631 (PMC5259651; doi:10.1111/jvim.14631), 2016-12-29
Supplement: JVIM-31-124-s002.pdf [file JVIM-31-124-s002.pdf]

**Table S1.** Respiratory sampling technique, information on treatment outcome, prior antimicrobial treatment, bacterial culture and antimicrobial susceptibility results as well as information on antimicrobial treatment regimen of individual dogs (n=19) with bacterial pneumonia. “Initial antimicrobial” refers to the antibiotics administered prior to the availability of bacterial culture results and “Corrected antimicrobial” refers to possible changes made during the treatment. “Per oral antimicrobial” refers to the treatment dogs received at home after hospital discharge. Antimicrobial treatment was either discontinued 5–7 days after CRP normalization in (referred as “CRP guided”) or administered according to conventional recommendations.

BAL= Bronchoalveolar lavage, TTW= Transtracheal wash, TTA = Transthoracic aspirate AMC= Amoxycillin/Clavulanic acid, TMS= Trimethoprim/Sulfamethoxazole

| Dog | Survived   | Prior antibiotics | Sampling method | Bacterial culture results                           | Antimicrobial susceptibility                                                                                  | Initial antimicrobial                                        | Corrected antimicrobial                   | Per oral antimicrobial                       | CRP guided |
|-----|------------|-------------------|-----------------|-----------------------------------------------------|---------------------------------------------------------------------------------------------------------------|--------------------------------------------------------------|-------------------------------------------|----------------------------------------------|------------|
| 1   | Yes        | Yes               | BAL             | <i>Actinomyces coleocanis</i>                       | Penicillin S<br>Ciprofloxacin R                                                                               | Ampicillin 20 mg/kg iv. TID<br>Enrofloxacin 5 mg/kg BID      |                                           | AMC 22 mg/kg TID                             | No         |
| 2   | Yes        | Yes               | BAL             | <i>Nocardiosis spp.</i>                             |                                                                                                               | AMC 20 mg/kg po. BID<br>Enrofloxacin 8 mg/kg po. SID         |                                           | AMC 20 mg/kg BID<br>Enrofloxacin 8 mg/kg SID | No         |
| 3   | Yes        | Yes               | BAL             | <i>Mycoplasma spumans</i>                           |                                                                                                               | AMC 22 mg/kg TID                                             |                                           | AMC 21 mg/kg TID                             | No         |
| 4   | Yes        | Yes               | TTA             | <i>Str. canis</i>                                   | Penicillin G S<br>TMS S<br>Erythromycin R<br>Clindamycin R<br>Doxycycline S<br>Enrofloxacin R<br>Ampicillin S | Ampicillin 22 mg/kg iv. TID                                  |                                           | Amoxycillin 19 mg/kg TID                     | No         |
| 5   | Yes        | Yes               | TTW             | No growth                                           |                                                                                                               | Ampicillin 22 mg/kg iv. TID<br>Enrofloxacin 10 mg/kg iv. BID | At day 3:<br>Doxycycline 7,5 mg/kg po BID | Doxycycline 9 mg/kg BID                      | No         |
| 6   | Yes        | No                | BAL             | <i>Str. zooepidemicus</i>                           | Ampicillin S<br>Azithromycin S<br>Cephalothin S<br>Clindamycin S<br>Doxycycline I<br>Penicillin G S           | Ampicillin 20 mg/kg iv                                       |                                           | AMC 15 mg/kg TID                             | No         |
| 7   | Yes        | Yes               | BAL             | <i>Actinomyces canis</i>                            | AMC S<br>Clindamycin S                                                                                        | AMC 22 mg/kg po.TID                                          |                                           | AMC 22 mg/kg TID                             | No         |
| 8   | Yes        | No                | TTW             | No growth                                           |                                                                                                               | AMC 22 mg/kg iv TID                                          |                                           | AMC 22 mg/kg BID                             | No         |
| 9   | Yes        | Yes               | BAL             | <i>Pasteurella canis</i>                            | AMC S<br>Ampicillin S<br>Enrofloxacin S<br>Doxycycline S<br>TMS S                                             | AMC 20 mg/kg po BID                                          |                                           | AMC 20 mg/kg BID                             | No         |
| 10  | Yes        | No                | BAL             | <i>Pasteurella canis</i> ,<br><i>Mycoplasma sp.</i> | AMC S<br>Doxycycline S<br>Enrofloxacin S<br>Gentamicin I<br>TMS S                                             | Doxycycline 5 mg/kg po BID                                   |                                           | Doxycycline 5 mg/kg BID                      | Yes        |
|     | <b>Dog</b> | <b>Prior</b>      | <b>Sampling</b> | <b>Bacterial culture results</b>                    | <b>Antimicrobial</b>                                                                                          | <b>Initial antimicrobial</b>                                 | <b>Corrected</b>                          | <b>Per oral antimicrobial</b>                | <b>CRP</b> |

|    |     | antibiotics | method |                                           | susceptibility                                                                                                                                         |                                                              | antimicrobial                                                                 |                                                          | guided |
|----|-----|-------------|--------|-------------------------------------------|--------------------------------------------------------------------------------------------------------------------------------------------------------|--------------------------------------------------------------|-------------------------------------------------------------------------------|----------------------------------------------------------|--------|
| 11 | Yes | Yes         | BAL    | <i>E. coli</i>                            | Ampicillin I<br>AMC S<br>TMS S<br>Enrofloxacin S<br>Gentamicin S                                                                                       | Ampicillin 22 mg/kg iv. QID<br>Enrofloxacin 10 mg/kg iv. BID |                                                                               | AMC 19 mg/kg TID<br>Enrofloxacin 8,5 mg/kg<br>BID        | Yes    |
| 12 | Yes | Yes         | TTW    | <i>Haemophilus sp.</i>                    | Ampicillin S<br>Enrofloxacin S<br>TMS S<br>AMC S<br>Gentamicin S                                                                                       | Ampicillin 22 mg/kg iv. TID<br>Enrofloxacin 10 mg/kg iv. BID | At day 3:<br>Doxycycline 8 mg/kg po.<br>BID<br>Cefuroxime 20 mg/kg iv.<br>TID | Doxycycline 8 mg/kg<br>BID<br>Cefuroxime 20 mg/kg<br>BID | Yes    |
| 13 | Yes | No          | TTW    | <i>Str. canis</i>                         | Penicillin G S<br>TMS R<br>Erythromycin S<br>Clindamycin S                                                                                             | Doxycycline 7,5 mg/kg po BID                                 |                                                                               | Doxycycline 7,5 mg/kg<br>BID                             | Yes    |
| 14 | Yes | Yes         | BAL    | <i>E. coli</i>                            | Ampicillin S<br>AMC S<br>TMS S<br>Enrofloxacin S<br>Gentamicin S                                                                                       | Ampicillin 22 mg/kg iv. QID<br>Enrofloxacin 10 mg/kg iv. BID |                                                                               | AMC 20 mg/kg TID                                         | Yes    |
| 15 | Yes | No          | BAL    | <i>Haemophilus sp.</i>                    | AMC S<br>Doxycycline S<br>Enrofloxacin S<br>TMS S                                                                                                      | Doxycycline 10 mg/kg po. BID                                 |                                                                               | Doxycycline 10 mg/kg<br>po. BID                          | Yes    |
| 16 | Yes | No          | TTW    | <i>Pasteurella canis</i>                  | Ampicillin S<br>AMC S<br>TMS S<br>Enrofloxacin S<br>Gentamicin S<br>Doxycycline S                                                                      | AMC 22 mg/kg iv. TID                                         |                                                                               | AMC 21 mg/kg TID                                         | Yes    |
| 17 | Yes | Yes         | BAL    | <i>Actinomyces canis</i>                  | Ampicillin S<br>Doksicycline S<br>Ciprofloxacin S<br>Gentamycin S                                                                                      | AMC 22 mg/kg iv. TID                                         |                                                                               | AMC 22 mg/kg BID                                         | Yes    |
| 18 | No  | No          | TTA    | <i>E. coli</i>                            | Ampicillin I<br>AMC I<br>TMS S<br>Enrofloxacin S<br>Gentamicin S<br>Doxycycline S                                                                      | Ampicillin 22 mg/kg iv. QID<br>Enrofloxacin 10 mg/kg BID     |                                                                               |                                                          |        |
| 19 | No  | Yes         | Sputum | <i>E. coli</i><br><i>Arcanobacter sp.</i> | Ampicillin R<br>AMC R<br>TMS R<br>Enrofloxacin R<br>Gentamicin R<br>Cefpodoxime R<br>Cefuroxime sodium R<br>Doxycycline R<br>Amikacin S<br>Meropenem S | Ampicillin 22 mg/kg iv. TID<br>Enrofloxacin 10 mg/kg iv. BID | At day 2:<br>Ampicillin 22 mg/kg iv.<br>TID<br>Gentamycin 6,6 mg/kg<br>SID    |                                                          |        |
